# Supplementary material
Source: Springer Nature journal article supplement (https://www.springermedizin.de/resource/supplementary/12984_2010_245_MOESM3_ESM.pdf/9605608)

Stdev of COP X,  $\sigma_X$  (mm)

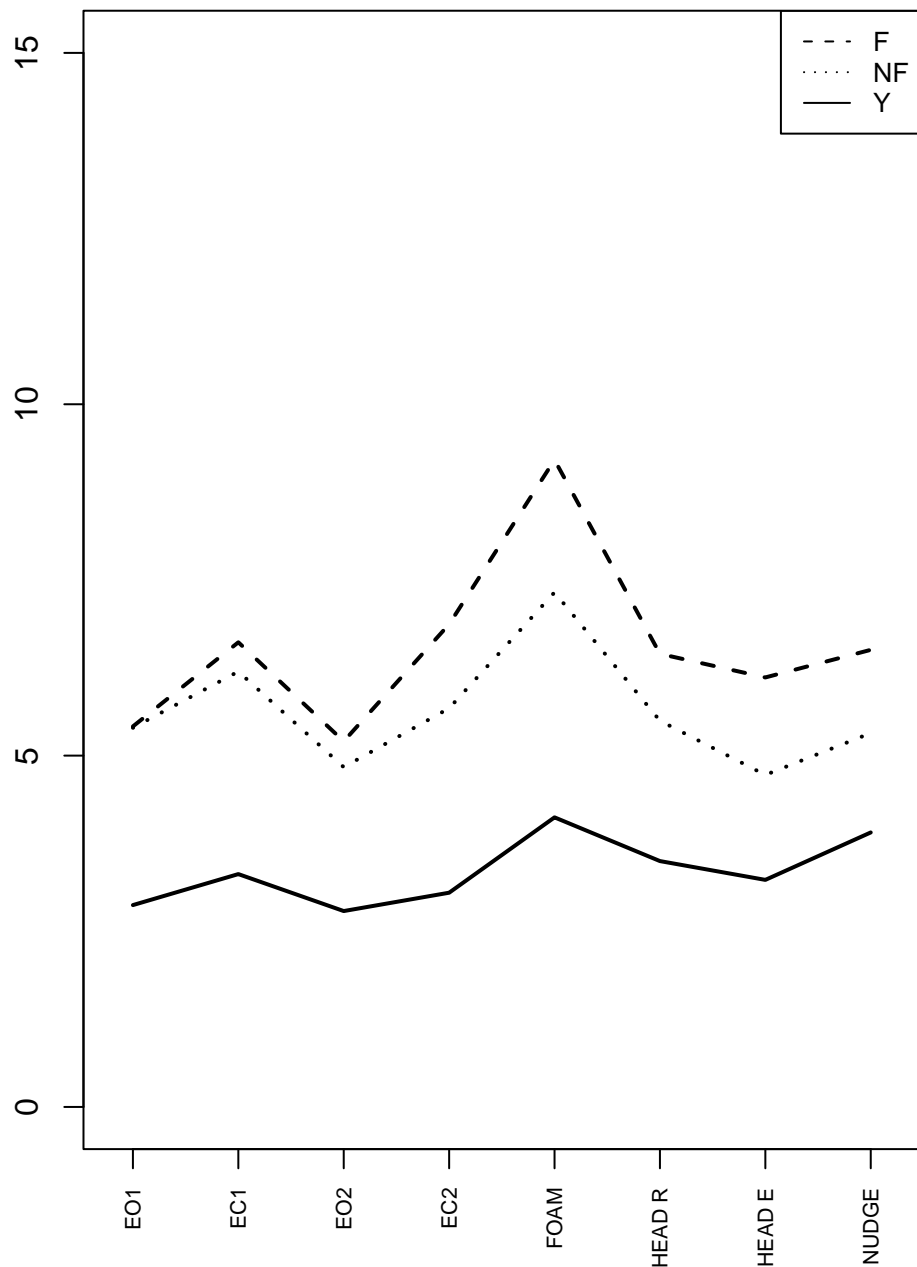

Stdev of COP Y,  $\sigma_Y$  (mm)

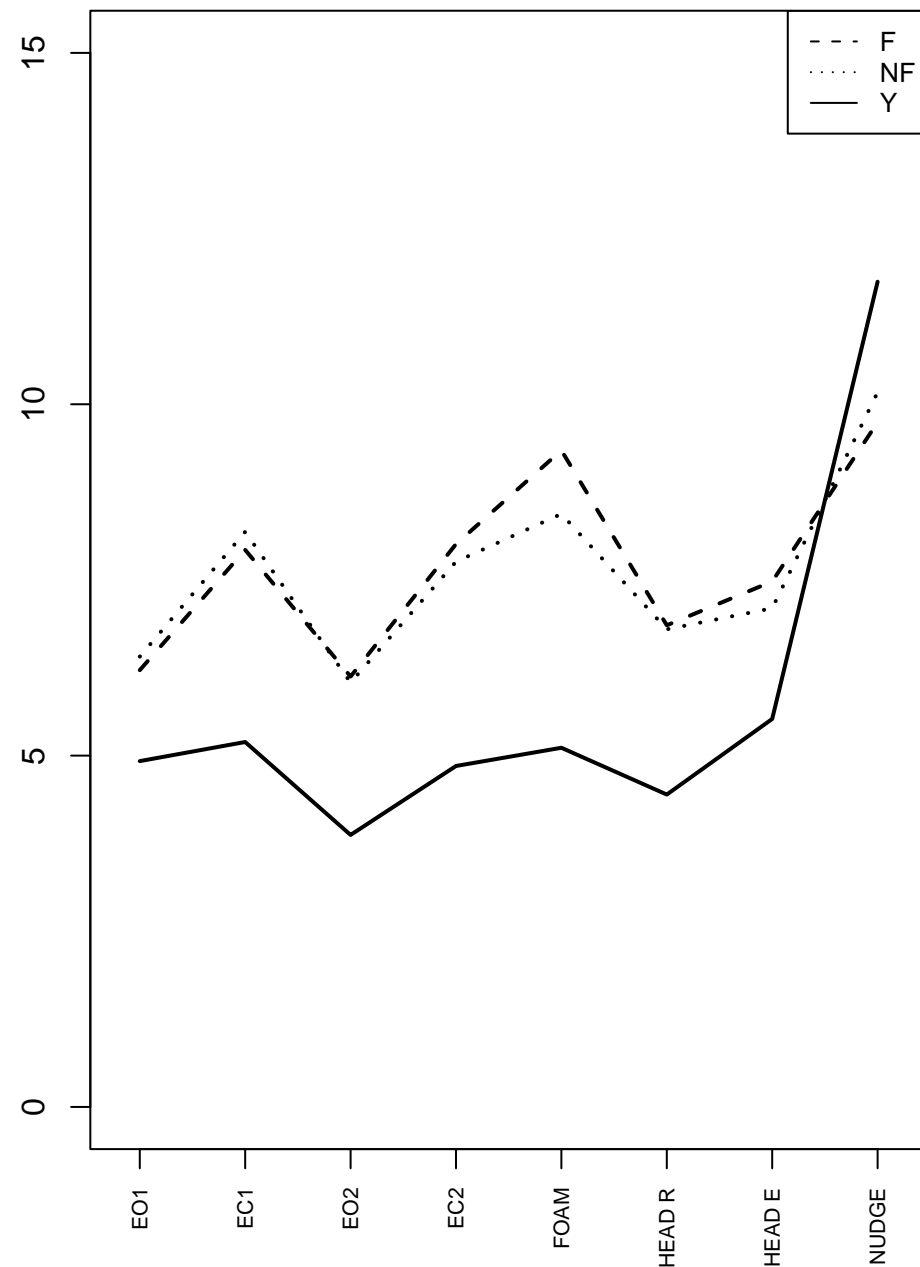

Supplement: MOESM3 [file 9605608]
